# Supplementary material
Source: Springer Nature journal article supplement (https://www.springermedizin.de/resource/supplementary/13054_2013_3056_MOESM1_ESM.pdf/9712594)
Supplement: MOESM1 [file 9712594]

# PHOSPHOLIPIDS

(basic components of cellular membranes)

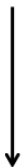

rupture/release by PLA<sub>2</sub>

ARACHIDONIC ACID

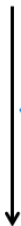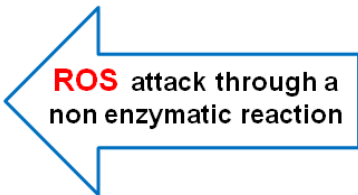

Lipid Endoperoxide

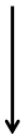

spontaneous rupture

**MDA**
